# Supplementary material for: Antitumor activity of Chlorella sorokiniana and Scenedesmus sp. microalgae native of Nuevo León State, México
Source: PeerJ. 2018 Feb 9;6:e4358. doi: 10.7717/peerj.4358 (PMC5808310; doi:10.7717/peerj.4358)
Supplement: Supplemental Information 4 [file peerj-06-4358-s007.xlsx]

## Sheet: Chlorella 3 (Mta 6)
						Dias	Cels/mL 10´6	Cels/mL 10´6	Cels/mL 10´6	Promedio	DS	ESM
						0	21.6	15.4	18.6	18.5333	3.10054	1.7901
						1	84.8	50.2	62.8	65.9333	17.5115	10.1103
						2	180	72	154	135.333	56.3678	32.544
						3	204	152	108	154.667	48.0555	27.7449
						4	83.2	122	218	141.067	69.3932	40.0642
						5	154	208	228	196.667	38.2797	22.1008
						6	203.2	340	308	283.733	71.5557	41.3127
						7	328	402	478	402.667	75.0022	43.3026
						8	448	582	478	502.667	70.3231	40.601
						9	604	602	498	568	60.63	35.0048
						10	792	822	704	772.667	61.3297	35.4087
						11	704	810	728	747.333	55.5818	32.0902
						12	688	792	801.2	760.4	62.8688	36.2973
						13	682	718	728	709.333	24.1937	13.9682

## Sheet: Photobioreactor culture
						Dias	Biomasa Chlorella g/L	Error STD		Dias	Biomasa Scenedesmus g/L	Error STD
						4	0.08	0.01		4	0.09	0.01
						6	0.13	0.006		6	0.13	0.005
						8	0.15	0.01		8	0.16	0.01
						11	0.14	0.02		11	0.16	0.008
						13	0.22	0.03		13	0.16	0.02
						15	0.24	0.01		15	0.24	0.02
						18	0.31	0.02		18	0.25	0.01
						20	0.34	0.02		20	0.51	0.02
						22	0.38	0.03		22	0.78	0.04
						25	0.39	0.01		25	0.83	0.04
						27	0.41	0.01		27	0.79	0.03
						29	0.39	0.02		29	0.78	0.04

## Sheet: apoptosis assay
Celulas apoptoticas %	Celulas Vivas%	Celulas Necroticas %					Err Apoptoticas	Err Vivas	Err Necroticas
65.7267	25.57	9.02333	Chlorella sorokiniana				3.17341	3.23506	0.545721
50.9167	45.97	3.1	Scenedesmus sp.				0.0409607	0.786215	0.748398
57.68	34.95	7.25	Actinomicina				1.66	3.43	1.89
4	94.25	1.73	Sin Tx				1.51	0.31	1.44
4	94.25	1.73	Sin Tx				1.51	0.31	1.44
57.68	34.95	7.25	Actinomicina D				1.66	3.43	1.89
65.7267	25.57	9.02333	Chlorella				3.17341	3.23506	0.545721
50.9167	45.97	3.1	Scenedesmus				0.0409607	0.786215	0.748398
TOTAL CELL NUMBERS
	REP 1	REP 2	REP 3	MEDIA	D. EST	SEM	T STUD
0	0	0	0	0	0	0
Chlorella apoptoticas	136	110	98	114.667	19.4251	11.2151	0.00573667
Chlorella Necroticas	20	16	12	16	4	2.3094	0.0157215
Chlorella Vivas	42	59	34	45	12.7671	7.37111	0.0143105
Scenedesmus Apoptoticas	156	136	60	117.333	50.6491	29.2423	0.0292157
Scenedesmus Necroticas	13	9	2	8	5.56776	3.21455	0.105193
Scenedesmus Vivas	137	122	56	105	43.0929	24.8797	0.315627
Actinomicina apoptoticas	61	70	61	64	5.19615	3	6.24083e-05
Actinomicina necroticas	4	10	10	8	3.4641	2	0.0313996
Actinomicina vivas	45	43	29	39	8.7178	5.03322	0.0304529
Sin Tx Apoptoticas	2	9	2	4.33333	4.04145	2.33333	0.00800052
Sin Tx Necroticas	1	2	2	1.66667	0.57735	0.333333	0.0295926
Sin Tx vivas	73	117	81	90.3333	23.4379	13.5319	0.0137758
PERCENTAGES
	REP 1	REP 2	REP 3	MEDIA	D. EST	SEM	T STUD
0	0	0	0	0	0	0
Chlorella apoptoticas	69.68	59.45	68.05	65.7267	5.49651	3.17341	0.00283684
Chlorella Necroticas	10.1	8.64	8.33	9.02333	0.945216	0.545721	0.00613808
Chlorella Vivas	21.21	31.89	23.61	25.57	5.60328	3.23506	0.00230005
Scenedesmus Apoptoticas	50.98	50.93	50.84	50.9167	0.070946	0.0409607	0.00051641
Scenedesmus Necroticas	4.24	3.37	1.69	3.1	1.29626	0.748398	0.163123
Scenedesmus Vivas	44.77	45.69	47.45	45.97	1.36176	0.786215	0.000563542
Actinomicina apoptoticas	55.45	56.91	61	57.7867	2.87698	1.66103	0.00114669
Actinomicina necroticas	3.63	8.13	10	7.25333	3.27424	1.89038	0.0386149
Actinomicina vivas	40.9	34.95	29	34.95	5.95	3.43523	0.00175256
Sin Tx Apoptoticas	2.63	7.03	2.34	4	2.62806	1.51731	#DIV/0!
Sin Tx Necroticas	1.31	1.56	2.34	1.73667	0.537246	0.310179	2.54459e-05
Sin Tx vivas	96.05	91.4	95.3	94.25	2.4965	1.44135	0.000162625

## Sheet: lymphocyte viability 
Residentes	Conc A						Err Residentes	Err Conc A
100	100						0	5.80156e-15		0
95.8177	96.839						3.26241	1.71737		7.8
96.8988	97.3635						2.58173	0.71093		15.6
95.3505	91.2494						2.08532	3.30575		31.2
85.0727	81.0942						1.2722	5.42391		62.5
83.0701	80.5436						1.02768	5.00748		125
71.7846	60.5233						1.29927	3.44242		250
73.8923	53.7129						2.71286	3.55403		500
EFECTO LINFOPROLIFERATIVO EN CELULAS DE TIMO
Ensayo:	EXTRACTO Metanolico de Chlorella sorokiniana Muestra 3
*Valores presentados en absorbancias 540 nm
	VIABILIDAD
Tratamiento	Repetición 1	Repetición 2	Repetición 3	Media	D.S.	S.E.M.	Analisis estadisticos
0	100	100	100	100	1.00486e-14	5.80156e-15	0
7.8	96.5551	99.9454	94.0166	96.839	2.97457	1.71737	0.10352
15.6	98.0592	98.0895	95.9417	97.3635	1.23137	0.71093	0.0328162
31.2	97.7196	89.1921	86.8366	91.2494	5.72572	3.30575	0.0589924
62.5	89.2285	83.2424	70.8117	81.0942	9.39448	5.42391	0.0366819
125	90.4901	76.583	74.5578	80.5436	8.6732	5.00748	0.0301544
250	65.1625	62.6092	53.7981	60.5233	5.96244	3.44242	0.0037592
500	49.345	60.7533	51.0406	53.7129	6.15577	3.55403	0.00292196
Ensayo:	EXTRACTO metanolico de Scenedesmus sp. Muestra 5
*Valores presentados en absorbancias 540 nm
	VIABILIDAD
Tratamiento	Repetición 1	Repetición 2	Repetición 3	Media	D.S.	S.E.M.	Analisis estadisticos
0	100	100	100	100	0	0	0
7.8	93.9094	98.9589	103.777	98.8816	4.93404	2.84867	0.366255
15.6	91.671	98.8027	100.426	96.9664	4.65719	2.68883	0.188184
31.2	98.3342	102.03	95.0532	98.4725	3.49056	2.01527	0.263809
62.5	97.5534	100	94.0426	97.1986	2.99452	1.72889	0.1233
125	83.2379	96.252	98.2979	92.5959	8.16858	4.71613	0.128501
250	55.7522	76.835	81.9681	71.5184	13.8931	8.02117	0.0354867
500	57.366	57.0016	57.234	57.2005	0.184495	0.106518	3.0968e-06

## Sheet: Tumor citotoxicity
Chlorella sp. Met	Scenedesmus sp Met						Err Chlorella sp	Err Scendesmus sp
3.81148	9.26054						5.8383	8.59152
6.90641	1.62054						1.43525	1.54892
0.789842	0.909787						2.70444	2.03355
-1.55475	1.81986						1.55361	0.89509
2.20713	14.9132						3.2181	3.78421
17.0734	25.455						1.1032	2.73777
61.8977	74.7789						3.2665	1.84699
Ensayo:	EXTRACTO ACUOSO DE MUESTRA 3 Chlorella sorokiniana
*Valores presentados en absorbancias 540 nm
	Citotoxicidad
Tratamiento	Repetición 1	Repetición 2	Repetición 3	Media	D.S.	S.E.M.	Analisis estadisticos
0	0	0	0	0	0	0	0
7.8	28.9583	35.8375	20.8097	28.5352	7.52282	4.3433	0.0111962
15.6	20.5358	20.4704	13.8498	18.2853	3.84145	2.21786	0.00719741
31.2	16.8353	24.6401	30.1062	23.8605	6.66972	3.85076	0.0125351
62.5	19.9383	33.268	26.8614	26.6892	6.6665	3.84891	0.010085
125	28.6292	40.6664	33.3349	34.2102	6.06617	3.5023	0.00515945
250	45.8514	60.1782	40.119	48.7162	10.3319	5.96512	0.00733206
500	70.1455	68.7099	57.0814	65.3123	7.16422	4.13627	0.0019934
Ensayo:	EXTRACTO ACUOSO DE MUESTRA 10 Scendesmus sp.
*Valores presentados en absorbancias 540 nm
	Citotoxicidad
Tratamiento	Repetición 1	Repetición 2	Repetición 3	Media	D.S.	S.E.M.	Analisis estadisticos
0	0	0	0	0	0	0	0
7.8	24.2139	31.4203	34.3549	29.9964	5.21828	3.01278	0.00496883
15.6	25.8673	28.7443	31.3182	28.6432	2.72683	1.57434	0.00150369
31.2	20.561	25.434	33.5719	26.5223	6.57339	3.79515	0.00993366
62.5	28.2601	39.4131	30.713	32.7954	5.86083	3.38375	0.0052393
125	27.6312	40.8986	41.9879	36.8392	7.99294	4.61472	0.00766588
250	51.5297	60.3148	63.072	58.3055	6.02777	3.48013	0.00177186
500	71.8717	75.47	85.1071	77.4829	6.84346	3.95107	0.00129508
Ensayo:	Vincristina 250 microgramos/mL
*Valores presentados en absorbancias 540 nm
	Citotoxicidad
Tratamiento	Repetición 1	Repetición 2	Repetición 3	Media	D.S.	S.E.M.	Analisis estadisticos
0	0	0	0	0	0	0
250	72.29	77.08	81.14	76.8367	4.43002	2.55767	0.000553097
Ensayo:	EXTRACTO Metanolico de Chlorella sorokiniana Muestra 3
*Valores presentados en absorbancias 540 nm
	Citotoxicidad
Tratamiento	Repetición 1	Repetición 2	Repetición 3	Media	D.S.	S.E.M.	Analisis estadisticos
0	0	0	0	0	0	0	0
7.8	24.417	33.9695	0.290065	19.5588	17.3573	10.0213	0.0951164
15.6	22.6337	30.1527	4.20595	18.9975	13.3501	7.70768	0.0663179
31.2	19.0672	27.0992	26.2509	24.1391	4.41283	2.54775	0.00547844
62.5	22.7709	24.4275	30.6744	25.9576	4.168	2.40639	0.00424248
125	29.904	22.0102	35.388	29.1007	6.72497	3.88266	0.00866984
250	63.2373	42.112	50.0363	51.7952	10.6719	6.16145	0.00692877
500	65.2949	62.2137	76.2146	67.9078	7.35708	4.24761	0.00194483
Ensayo:	EXTRACTO metanolico de Scenedesmus sp. Muestra 5
*Valores presentados en absorbancias 540 nm
	Citotoxicidad
Tratamiento	Repetición 1	Repetición 2	Repetición 3	Media	D.S.	S.E.M.	Analisis estadisticos
0	0	0	0	0	0	0	0
7.8	0.653983	0.68408	26.4436	9.26054	14.8809	8.59152	0.196912
15.6	4.63734	-0.497512	0.721785	1.62054	2.68281	1.54892	0.202631
31.2	1.84304	-2.98507	3.87139	0.909787	3.52222	2.03355	0.349191
62.5	3.50773	1.49254	0.459318	1.81986	1.55034	0.89509	0.0895324
125	12.604	9.82587	22.3097	14.9132	6.55445	3.78421	0.0293848
250	20.0951	29.1045	27.1654	25.455	4.74195	2.73777	0.0056854
500	71.2247	75.6841	77.4278	74.7789	3.19908	1.84699	0.00030475
Ensayo:	Vincristina 250 microgramos/mL
*Valores presentados en absorbancias 540 nm
	Citotoxicidad
Tratamiento	Repetición 1	Repetición 2	Repetición 3	Media	D.S.	S.E.M.	Analisis estadisticos
0	0	0	0	0	0	0
250	82.48	86.44	85.82	84.9133	2.13001	1.22976	0.000104869
