# Supplementary material for: Antitumor activity of Chlorella sorokiniana and Scenedesmus sp. microalgae native of Nuevo León State, México
Source: PeerJ. 2018 Feb 9;6:e4358. doi: 10.7717/peerj.4358 (PMC5808310; doi:10.7717/peerj.4358)
Supplement: Supplemental Information 5 [file peerj-06-4358-s008.xlsx]

## Sheet: Chlorella Cloroformico
EFECTO CITOTOXICO CONTRA L5178Y-R
Ensayo:	Extracto Cloroformico de Chlorella
*Valores presentados en absorbancias 570 nm
EXP 1		ABSORBANCIAS
Tratamiento	Repetición 1	Repetición 2	Repetición 3	Media	D.S.	S.E.M.	% Viabilidad	%Citotoxicidad	SEM Cito	Indice Viabilidad	Analisis estadisticos
0	0.246	0.241	0.242	0.243	0.00264575	0.00152753	100	0		1
7.81	0.206	0.231	0.279	0.238667	0.037099	0.0214191	98.2167	1.78326	0.160039	0.982167	0.432259
15.62	0.248	0.236	0.246	0.243333	0.0064291	0.00371184	100.137	-0.137174	-0.00209248	1.00137	0.456967
31.25	0.219	0.221	0.236	0.225333	0.00929157	0.00536449	92.7298	7.27023	0.173082	0.927298	0.051748
62.5	0.245	0.237	0.244	0.242	0.0043589	0.00251661	99.5885	0.411523	0.00427951	0.995885	0.311018
125	0.265	0.261	0.261	0.262333	0.0023094	0.00133333	107.956	-7.9561	-0.0404376	1.07956	0.000148566
250	0.246	0.265	0.258	0.256333	0.00960902	0.00554777	105.487	-5.48697	-0.118753	1.05487	0.0996796
500	0.261	0.266	0.254	0.260333	0.00602771	0.0034801	107.133	-7.13306	-0.0953538	1.07133	0.0238766

## Sheet: Chlorella Hexanico
EFECTO CITOTOXICO CONTRA L5178Y-R
Ensayo:	Extracto Hexanico de Chlorella
*Valores presentados en absorbancias 570 nm
EXP 1		ABSORBANCIAS
Tratamiento	Repetición 1	Repetición 2	Repetición 3	Media	D.S.	S.E.M.	% Viabilidad	%Citotoxicidad	SEM Cito	Indice Viabilidad	Analisis estadisticos
0	0.246	0.241	0.242	0.243	0.00264575	0.00152753	100	0		1
7.81	0.167	0.164	0.16	0.163667	0.00351188	0.00202759	67.3525	32.6475	0.404454	0.673525	0.00016763
15.62	0.154	0.152	0.152	0.152667	0.0011547	0.000666667	62.8258	37.1742	0.162333	0.628258	4.76505e-05
31.25	0.163	0.147	0.16	0.156667	0.0085049	0.00491031	64.4719	35.5281	1.11354	0.644719	0.0009884
62.5	0.177	0.165	0.159	0.167	0.00916515	0.0052915	68.7243	31.2757	0.990991	0.687243	0.00140793
125	0.165	0.172	0.17	0.169	0.00360555	0.00208167	69.5473	30.4527	0.375102	0.695473	0.00118279
250	0.153	0.166	0.173	0.164	0.0101489	0.00585947	67.4897	32.5103	1.16154	0.674897	0.00411465
500	0.152	0.161	0.142	0.151667	0.00950438	0.00548736	62.4143	37.5857	1.35987	0.624143	0.00209134

## Sheet: Scenedesmus Cloroformico
EFECTO CITOTOXICO CONTRA L5178Y-R
Ensayo:	Extracto Cloroformico de Senedesmus
*Valores presentados en absorbancias 570 nm
EXP 1		ABSORBANCIAS
Tratamiento	Repetición 1	Repetición 2	Repetición 3	Media	D.S.	S.E.M.	% Viabilidad	%Citotoxicidad	SEM Cito	Indice Viabilidad	Analisis estadisticos
0	0.246	0.241	0.242	0.243	0.00264575	0.00152753	100	0		1
7.81	0.202	0.165	0.149	0.172	0.0271846	0.015695	70.7819	29.2181	2.66615	0.707819	0.019289
15.62	0.193	0.193	0.136	0.174	0.032909	0.019	71.6049	28.3951	3.10061	0.716049	0.0326587
31.25	0.176	0.285	0.189	0.216667	0.0595343	0.0343721	89.1632	10.8368	1.71915	0.891632	0.267788
62.5	0.155	0.208	0.166	0.176333	0.0279702	0.0161486	72.5652	27.4348	2.51248	0.725652	0.030873
125	0.187	0.217	0.155	0.186333	0.0310054	0.017901	76.6804	23.3196	2.24031	0.766804	0.044862
250	0.172	0.302	0.204	0.226	0.0677348	0.0391067	93.0041	6.99588	1.21056	0.930041	0.357279
500	0.141	0.159	0.161	0.153667	0.0110151	0.00635959	63.2373	36.7627	1.52145	0.632373	0.00380579

## Sheet: Scenedesmus Hexanico
EFECTO CITOTOXICO CONTRA L5178Y-R
Ensayo:	Extracto Hexanico de Scendesmus
*Valores presentados en absorbancias 570 nm
EXP 1		ABSORBANCIAS
Tratamiento	Repetición 1	Repetición 2	Repetición 3	Media	D.S.	S.E.M.	% Viabilidad	%Citotoxicidad	SEM Cito	Indice Viabilidad	Analisis estadisticos
0	0.246	0.241	0.242	0.243	0.00264575	0.00152753	100	0		1
7.81	0.159	0.177	0.159	0.165	0.0103923	0.006	67.9012	32.0988	1.16723	0.679012	0.0040859
15.62	0.182	0.189	0.134	0.168333	0.0299388	0.0172852	69.273	30.727	3.15518	0.69273	0.0241232
31.25	0.194	0.163	0.148	0.168333	0.0234592	0.0135442	69.273	30.727	2.47231	0.69273	0.0129146
62.5	0.169	0.142	0.135	0.148667	0.0179536	0.0103655	61.1797	38.8203	2.70668	0.611797	0.00445959
125	0.175	0.16	0.147	0.160667	0.0140119	0.00808977	66.118	33.882	1.706	0.66118	0.00353539
250	0.175	0.159	0.157	0.163667	0.00986577	0.005696	67.3525	32.6475	1.13621	0.673525	0.00143263
500	0.154	0.144	0.151	0.149667	0.0051316	0.00296273	61.5912	38.4088	0.760322	0.615912	0.000197587

## Sheet: Vincristine
EFECTO CITOTOXICO CONTRA L5178Y-R
Ensayo:	Vincristina 250 microgramos/Ml
*Valores presentados en absorbancias 570 nm
EXP 1		ABSORBANCIAS
Tratamiento	Repetición 1	Repetición 2	Repetición 3	Media	D.S.	S.E.M.	% Viabilidad	%Citotoxicidad	SEM Cito	Indice Viabilidad	Analisis estadisticos
0	0.246	0.241	0.242	0.243	0.00264575	0.00152753	100	0		1
7.81				#DIV/0!	#DIV/0!	#DIV/0!	#DIV/0!	#DIV/0!	#DIV/0!	#DIV/0!	#DIV/0!
15.62				#DIV/0!	#DIV/0!	#DIV/0!	#DIV/0!	#DIV/0!	#DIV/0!	#DIV/0!	#DIV/0!
31.25				#DIV/0!	#DIV/0!	#DIV/0!	#DIV/0!	#DIV/0!	#DIV/0!	#DIV/0!	#DIV/0!
62.5				#DIV/0!	#DIV/0!	#DIV/0!	#DIV/0!	#DIV/0!	#DIV/0!	#DIV/0!	#DIV/0!
125				#DIV/0!	#DIV/0!	#DIV/0!	#DIV/0!	#DIV/0!	#DIV/0!	#DIV/0!	#DIV/0!
250	0.065	0.068	0.069	0.0673333	0.00208167	0.00120185	27.7092	72.2908	1.29034	0.277092	0.00011518
500				#DIV/0!	#DIV/0!	#DIV/0!	#DIV/0!	#DIV/0!	#DIV/0!	#DIV/0!	#DIV/0!
EXP 2		ABSORBANCIAS
Tratamiento	Repetición 1	Repetición 2	Repetición 3	Media	D.S.	S.E.M.	% Viabilidad	%Citotoxicidad		Indice Viabilidad	Analisis estadisticos
0	0.527	0.41	0.442	0.459667	0.0604676	0.034911	100	0		1
7.81				#DIV/0!	#DIV/0!	#DIV/0!	#DIV/0!	#DIV/0!	#DIV/0!	#DIV/0!	#DIV/0!
15.62				#DIV/0!	#DIV/0!	#DIV/0!	#DIV/0!	#DIV/0!	#DIV/0!	#DIV/0!	#DIV/0!
31.25				#DIV/0!	#DIV/0!	#DIV/0!	#DIV/0!	#DIV/0!	#DIV/0!	#DIV/0!	#DIV/0!
62.5	0.183	0.133	0.115	0.143667	0.0352326	0.0203415	31.2545	68.7455	9.73356	0.312545	0.00201237
125	0.13	0.116	0.11	0.118667	0.0102632	0.00592546	25.8158	74.1842	3.70429	0.258158	0.00384379
250	0.105	0.105	0.106	0.105333	0.00057735	0.000333333	22.9152	77.0848	0.243939	0.229152	0.00480734
500	0.114	0.117	0.133	0.121333	0.0102144	0.00589727	26.3959	73.6041	3.57744	0.263959	0.00606886
